# Supplementary material for: Semen proteome and transcriptome of the endangered black-footed ferret (Mustela nigripes) show association with the environment and fertility outcome
Source: Springer Nature journal article supplement (doi:10.1038/s41598-024-57096-w), 2024-03-25
Supplement: MOESM1 [file 41598_2024_57096_MOESM1_ESM.pdf › 41598_2024_57096_MOESM1_ESM.pdf]

# Supplementary Figure S1

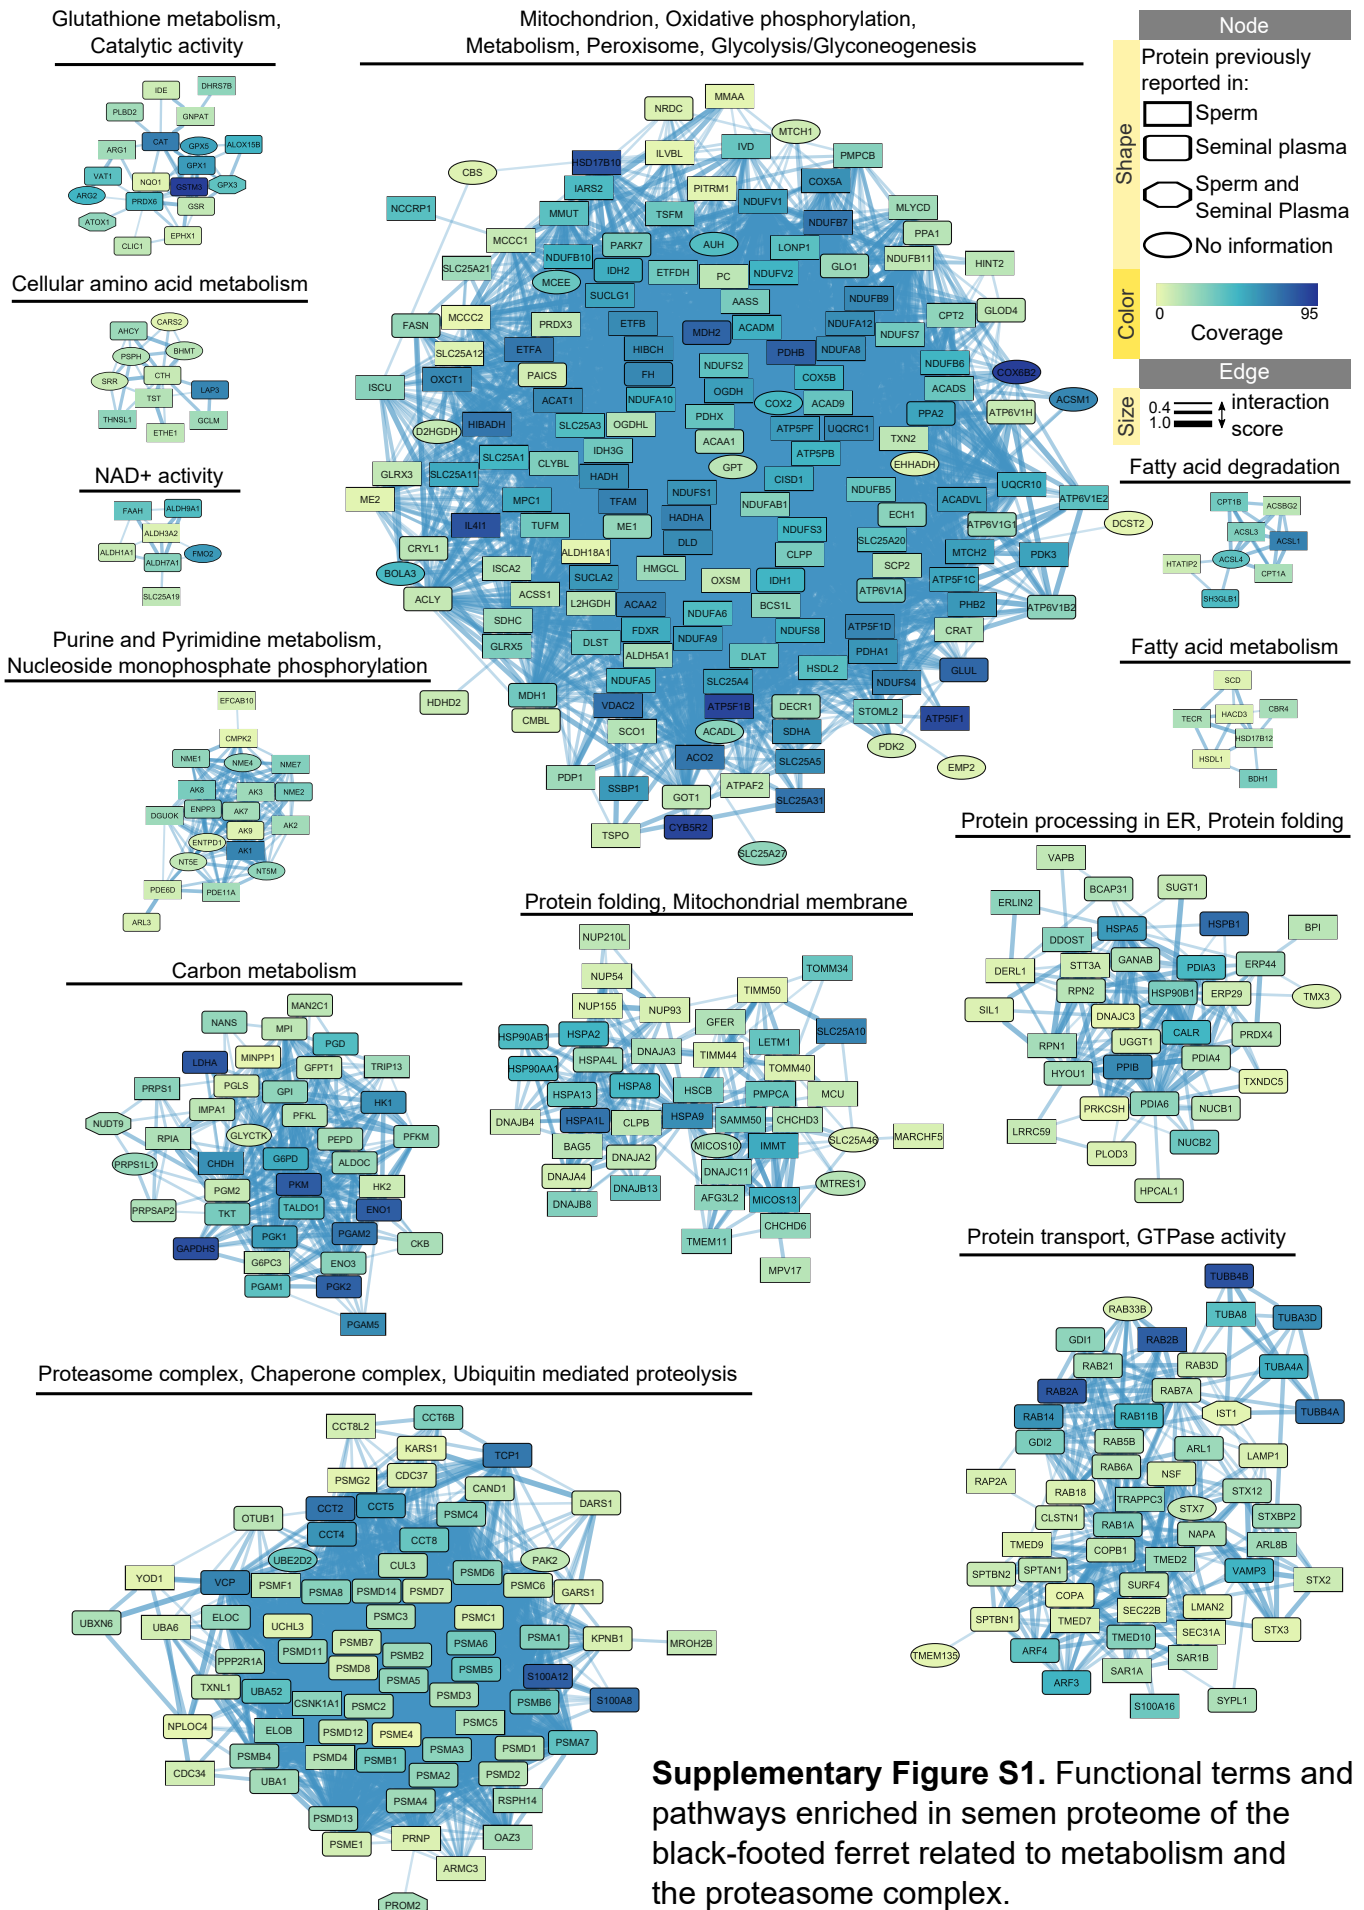

**Supplementary Figure S1.** Functional terms and pathways enriched in semen proteome of the black-footed ferret related to metabolism and the proteasome complex.

# Supplementary Figure S2

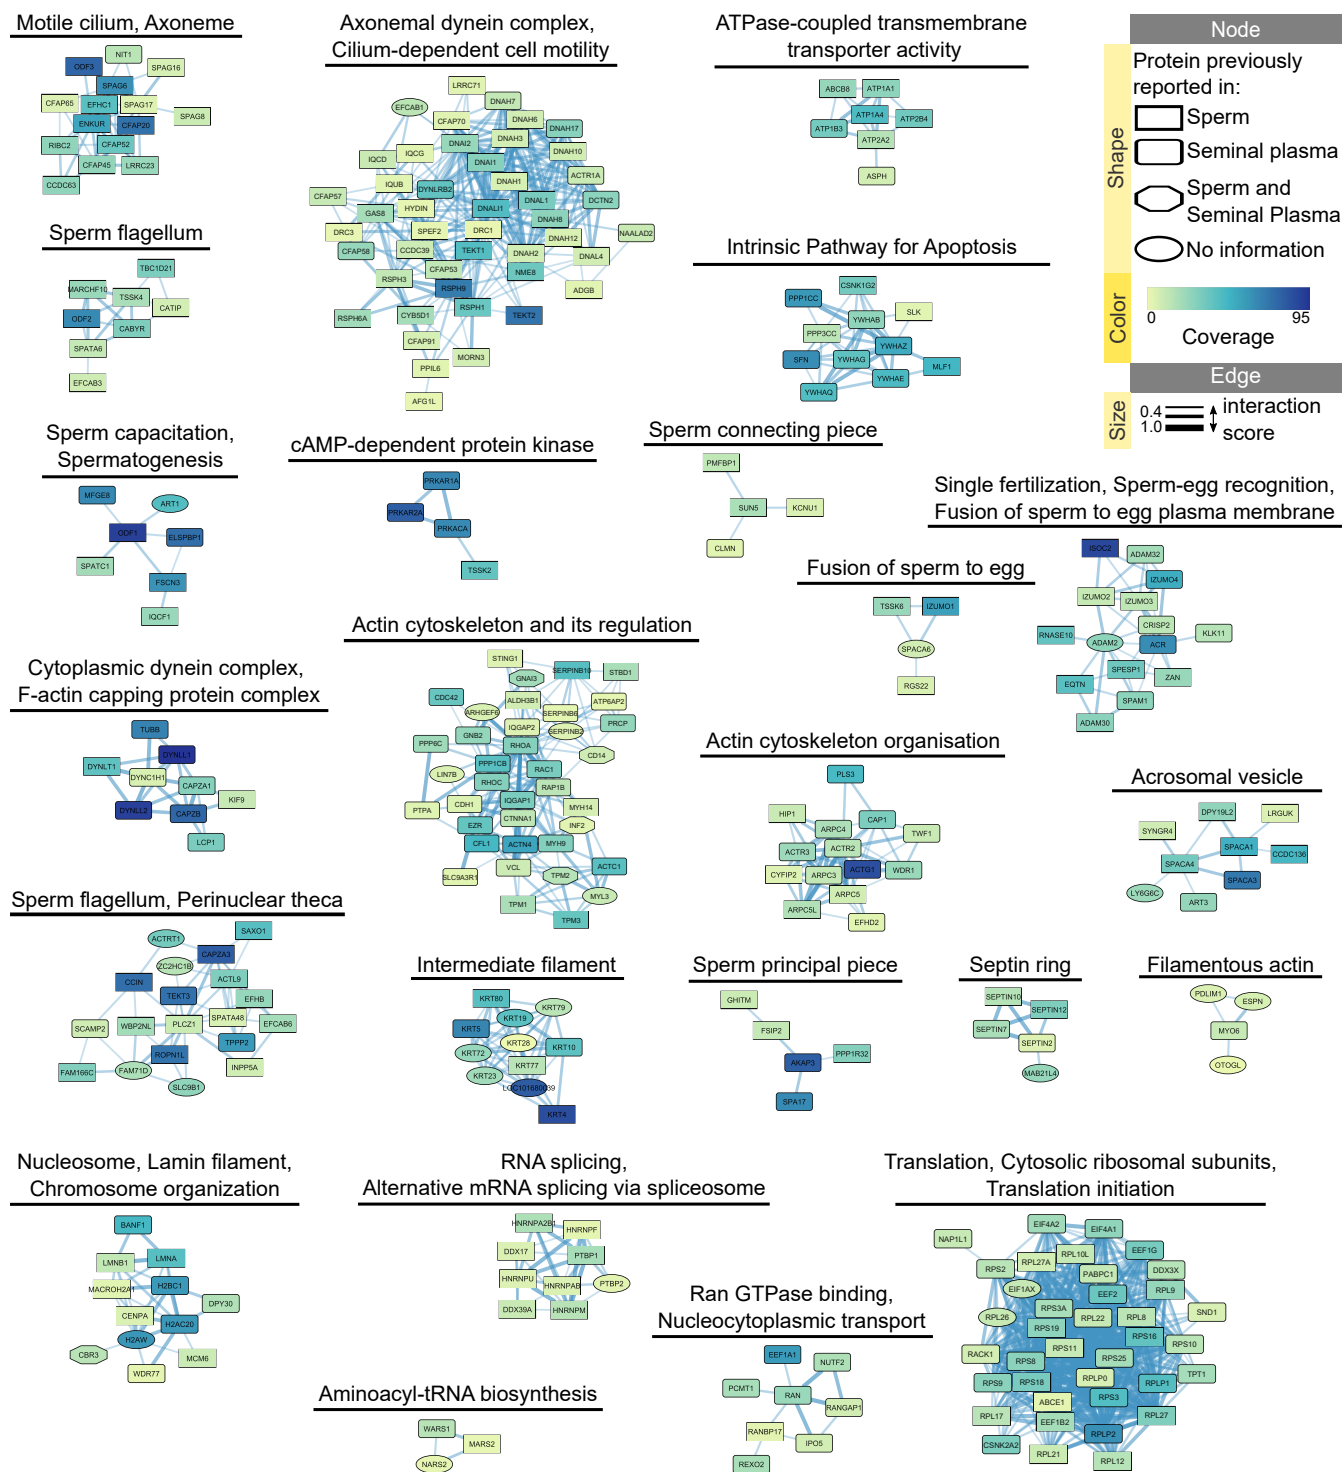

**Supplementary Figure S2.** Functional terms and pathways enriched in semen proteome of the black-footed ferret related to sperm structure, motility, capacitation, fertilization and translation.

# Supplementary Figure S3

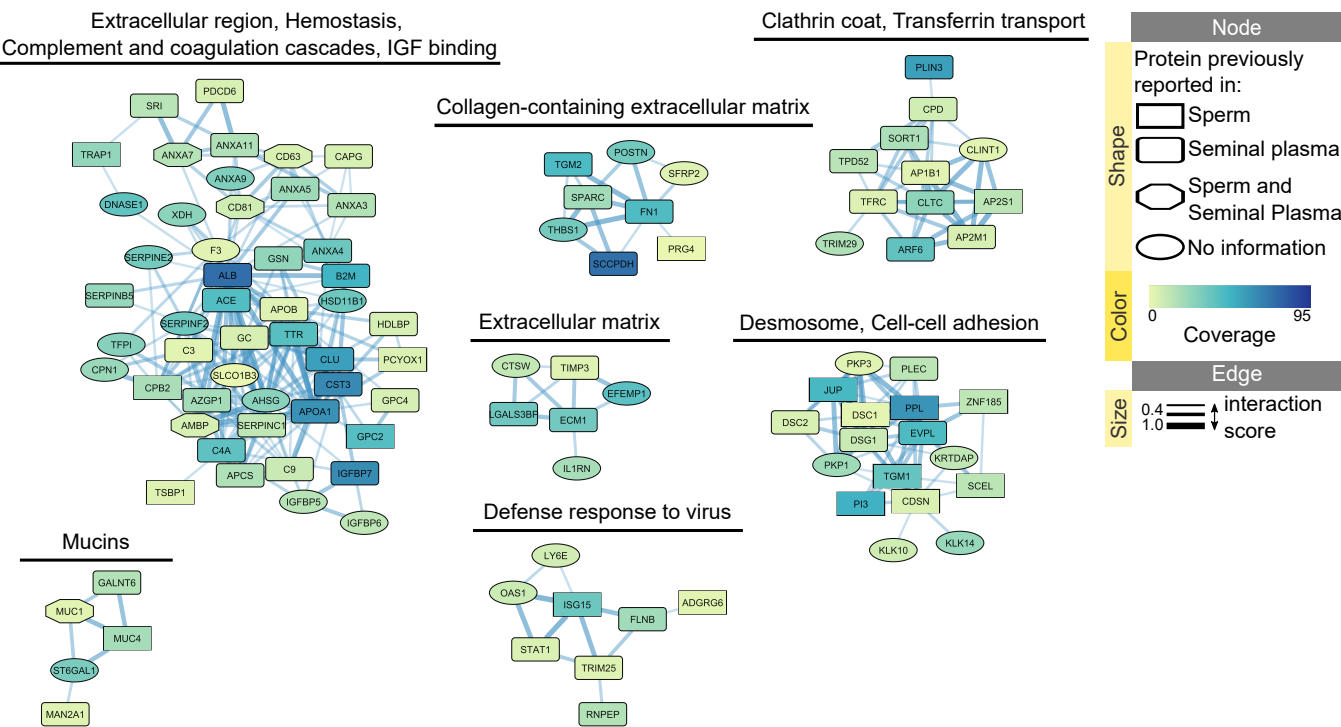

**Supplementary Figure S3.** Functional terms and pathways enriched in semen proteome of the black-footed ferret related to extracellular space.

# Supplementary Figure S4

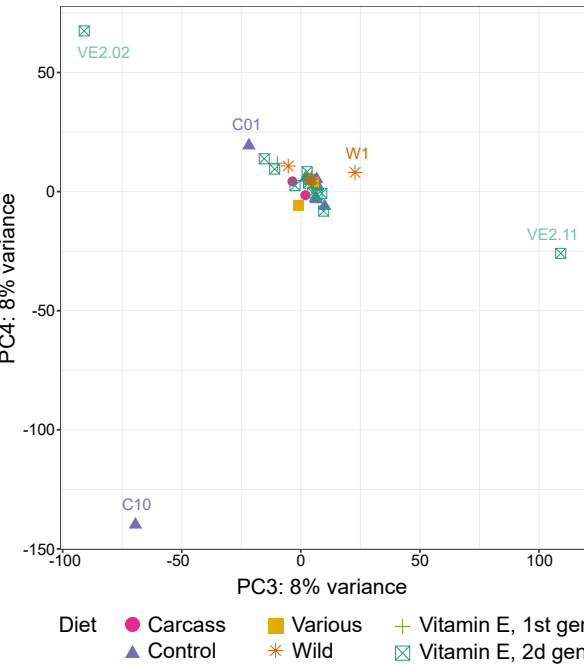

**Supplementary Figure S4.** Principal components 3 and 4 representing variation in semen transcriptome of all diet groups.

# Supplementary Figure S5

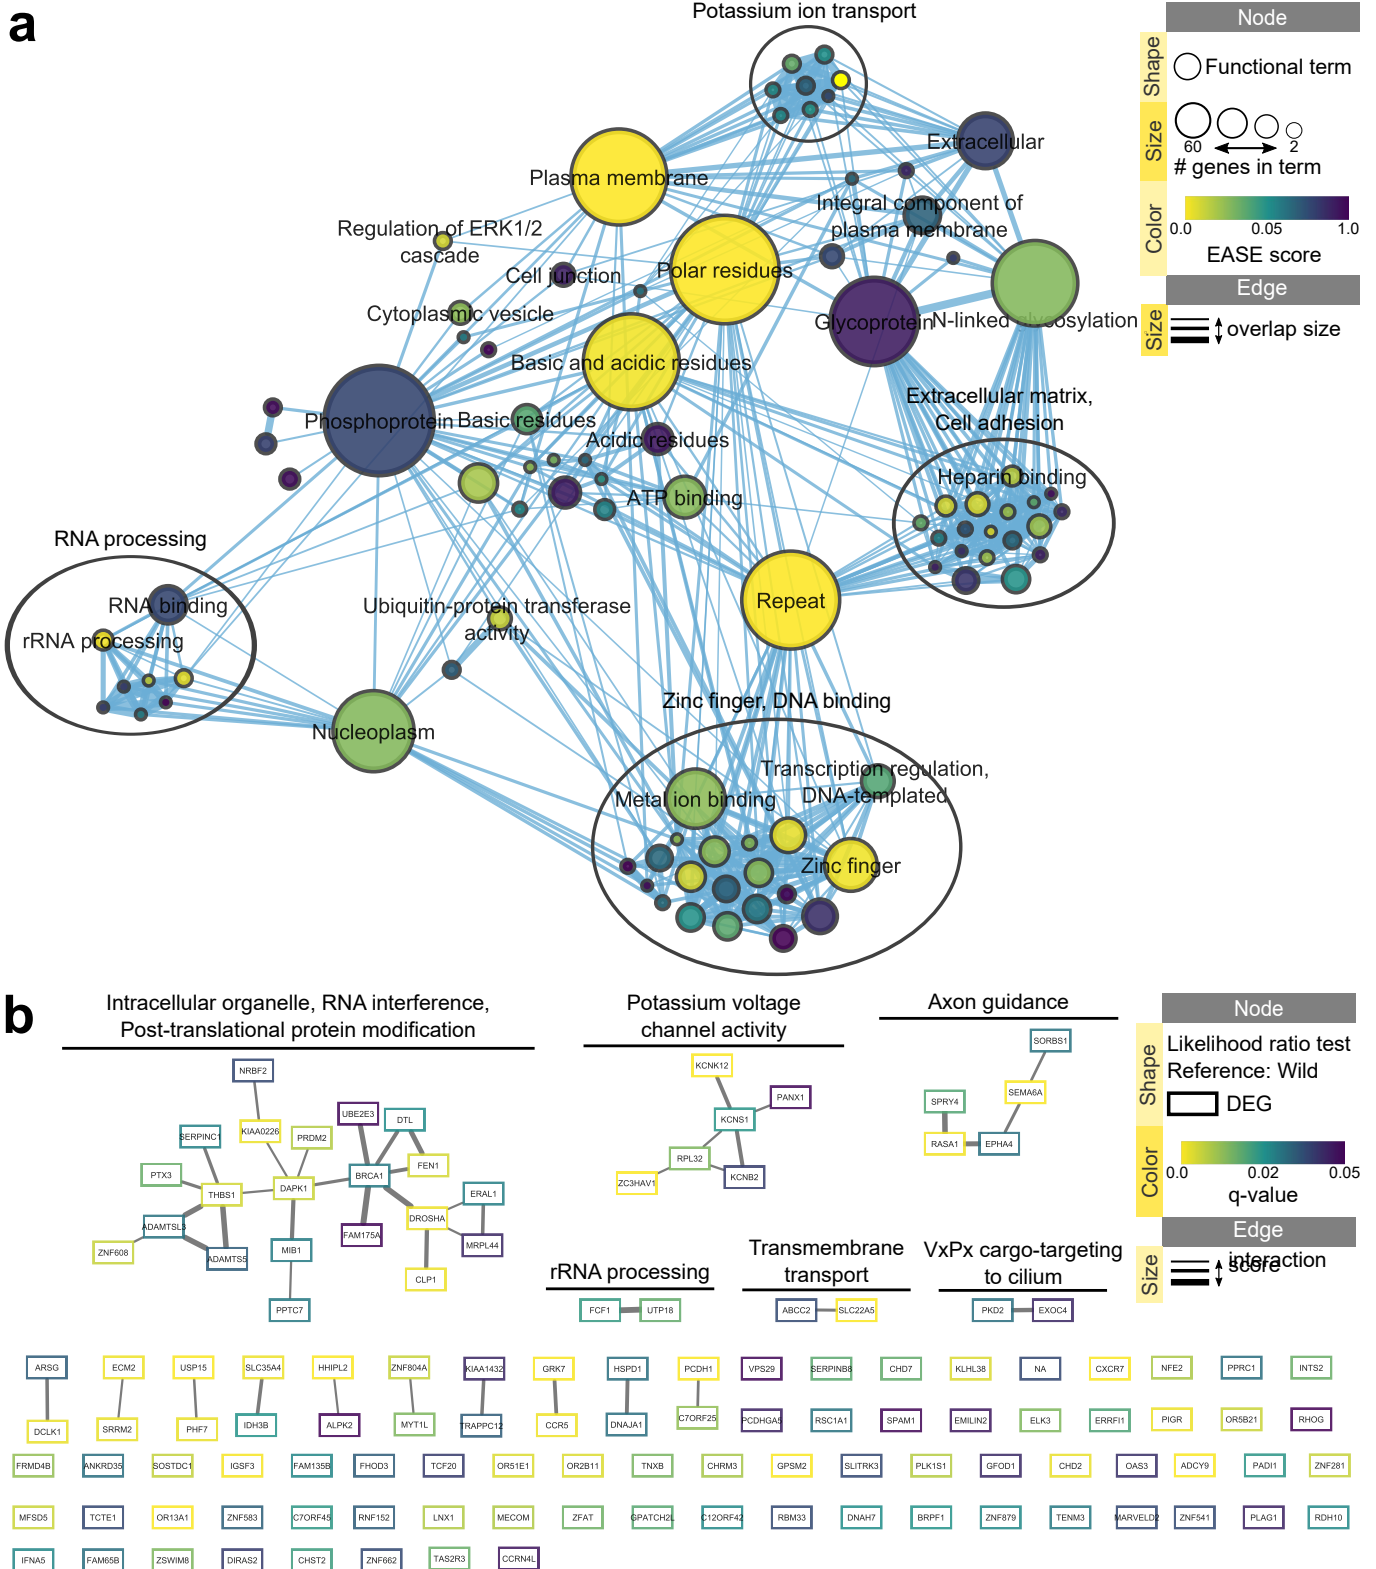

# Supplementary Figure S6

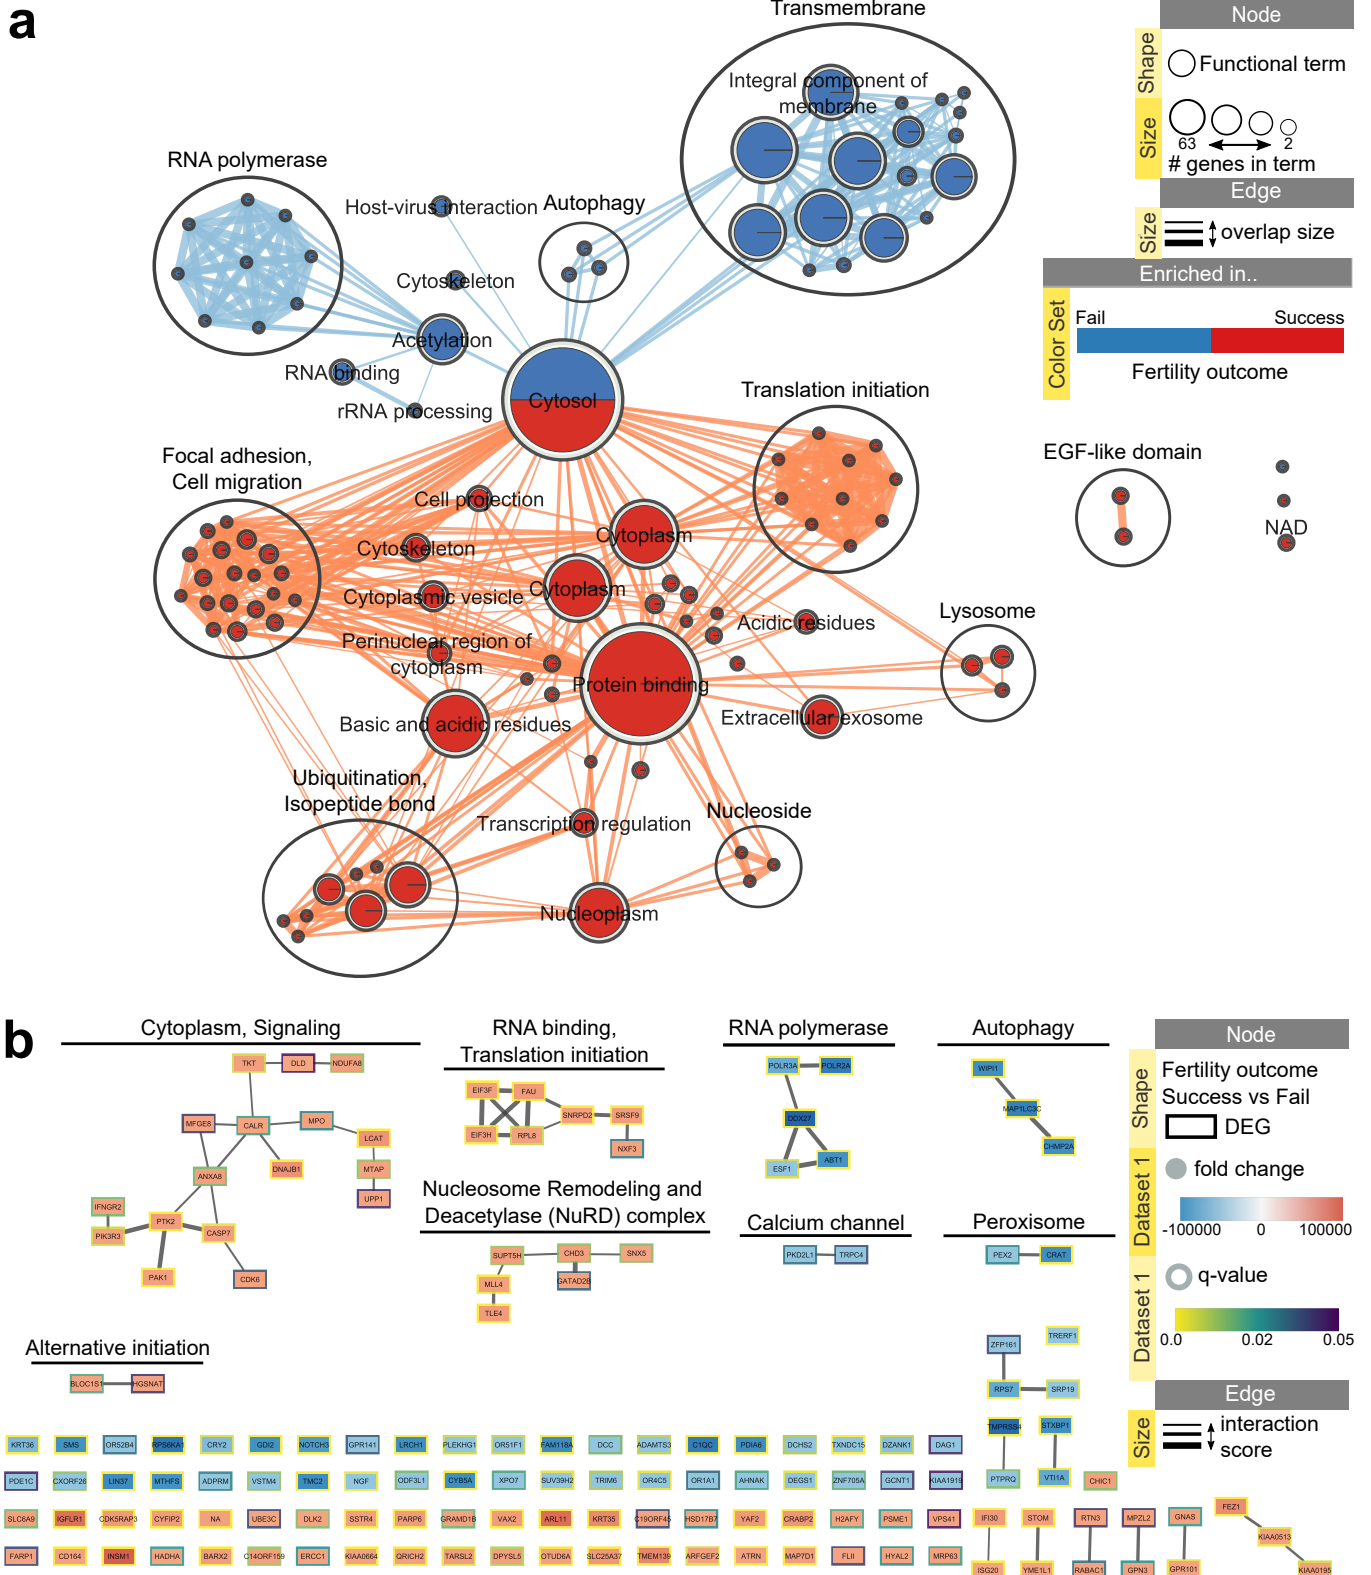

**Supplementary Figure S6. (a)** EnrichmentMap displaying enriched gene-sets and **(b)** STRING network of predicted protein interactions based on differentially expressed genes in semen of ferrets with success vs fail fertility outcome. Background for enrichment is set to *homo sapiens*.



# Supplementary Figure S7

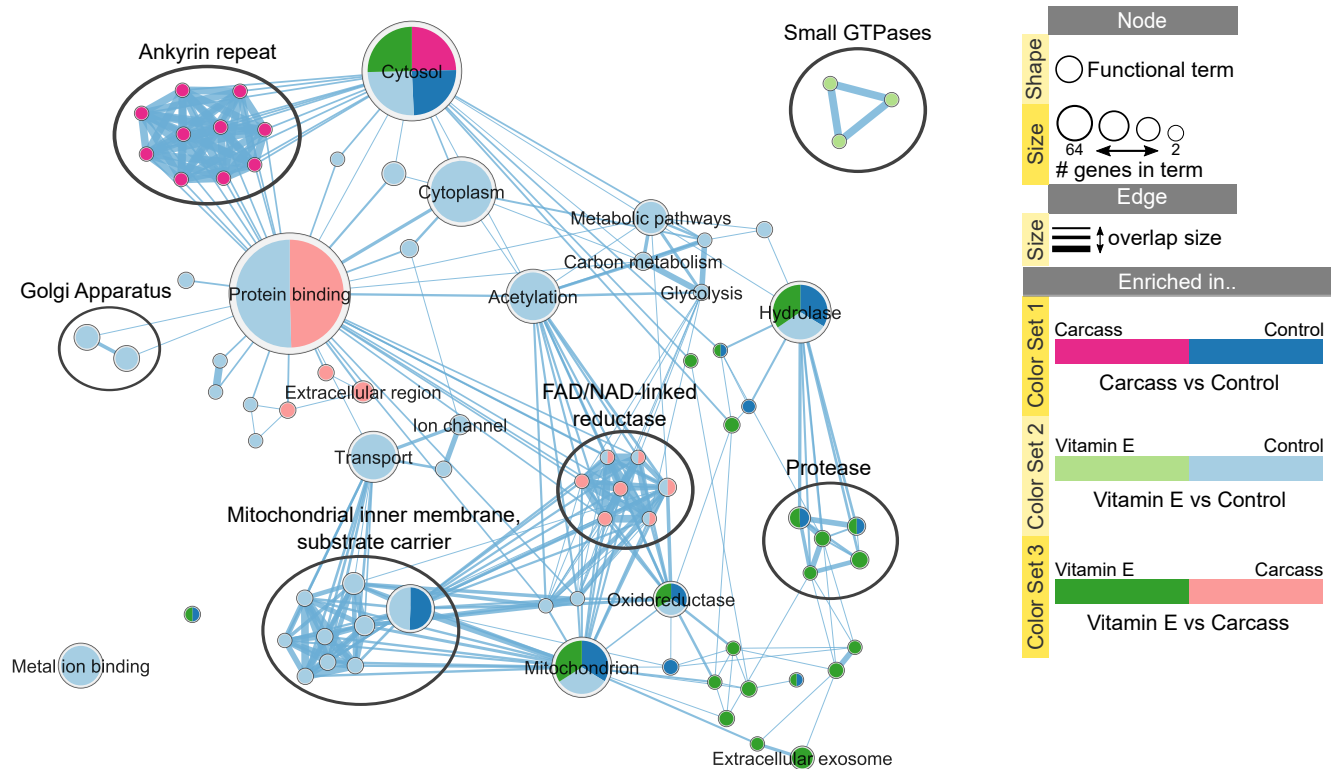

**Supplementary Figure S7.** EnrichmentMap displays enriched gene-sets based on differentially expressed genes between various diet comparison pairs with relation to fertility success. Background for enrichment is set to *homo sapiens*.
